# Supplementary material
Source: PubMed Central journal article supplement (PMC6741542)
Supplement: jin-0006-0485-s02.pdf [file jin-0006-0485-s02.pdf]

**Supplementary Table 1. Strain number, accession number and localization of *tirS* in genome of *S. aureus* isolates (NCBI)**

| <b>Strain no.</b> | <b>Accession no.</b> | <b>Localization</b>  |
|-------------------|----------------------|----------------------|
| MSSA476           | BX571857.1           | SCC <sub>476</sub>   |
| 45394F            | GU122149.1           | SCC45394F & SCCmecIV |
| HDE288            | AF411935.3           | SCCmecVI             |
| CMFT106           | HF569093.1           | SCCmec               |
| CMFT535           | HF569115.1           | SCCmec               |
| CMFT306           | HF569104.1           | SCCmec               |
| CMFT303           | HF569103.1           | SCCmec               |
| CMFT201           | HF569098.1           | SCCmec               |
| CMFT3002          | HF569102.1           | SCCmec               |
| CMFT181           | HF569097.1           | SCCmec               |
